# Supplementary material
Source: Springer Nature journal article supplement (https://www.springermedizin.de/resource/supplementary/13058_2013_3553_MOESM19_ESM.pdf/9703942)
Supplement: MOESM19 [file 9703942]

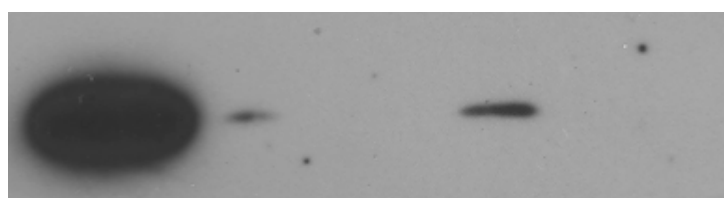

Crabp1

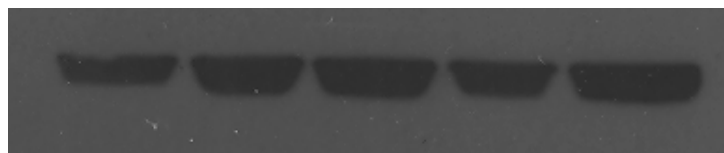

$\beta$  actin

NIH  
3T3      N      P      L      R
